# Supplementary material for: Chest X-ray Does Not Predict the Risk of Endotracheal Intubation and Escalation of Treatment in COVID-19 Patients Requiring Noninvasive Respiratory Support
Source: MDPI journal article supplement (doi:10.3390/jcm11061636), 2022-03-16
Supplement: s1 [file s1]

**Table S6. Logistic regression for hospital mortality**

| Variable                           | Univariable      |         | Multivariable    |         |
|------------------------------------|------------------|---------|------------------|---------|
|                                    | OR (95% CI)      | p-value | OR (95% CI)      | p-value |
| First CARE score                   | 0.98 (0.91-1.05) | 0.55    |                  |         |
| Age                                | 1.09 (1.03-1.15) | <0.01   | 1.14 (1.03-1.26) | 0.01    |
| Female gender                      | 0.53 (0.17-1.68) | 0.28    |                  |         |
| Days since symptoms onset          | 1.03 (0.92-1.16) | 0.59    |                  |         |
| SOFA score                         | 1.42 (1.09-1.84) | 0.01    | 1.29 (0.91-1.84) | 0.15    |
| Charlson comorbidity index         | 1.19 (1.01-1.40) | 0.04    | 1.09 (0.78-1.51) | 0.62    |
| C-reactive protein                 | 1.00 (1.00-1.01) | 0.12    |                  |         |
| Procalcitonin                      | 0.99 (0.85-1.15) | 0.88    |                  |         |
| D-dimer                            | 1.00 (1.00-1.00) | 0.89    |                  |         |
| Leukocyte count                    | 1.06 (0.97-1.15) | 0.18    |                  |         |
| Lymphocyte count                   | 0.99 (0.74-1.33) | 0.95    |                  |         |
| IL-6                               | 1.00 (1.00-1.00) | 0.08    |                  |         |
| PaO <sub>2</sub> /FiO <sub>2</sub> | 0.99 (0.98-1.00) | 0.17    |                  |         |
| PaCO <sub>2</sub>                  | 1.05 (1.00-1.11) | 0.07    |                  |         |

|                                                                                                                                                                                                                                                                                                                                                                                                                                                                       |                     |       |                     |       |
|-----------------------------------------------------------------------------------------------------------------------------------------------------------------------------------------------------------------------------------------------------------------------------------------------------------------------------------------------------------------------------------------------------------------------------------------------------------------------|---------------------|-------|---------------------|-------|
| Endotracheal intubation                                                                                                                                                                                                                                                                                                                                                                                                                                               | 17.50 (2.27-135.00) | <0.01 | 33.50 (3.49-122.00) | <0.01 |
| Duration of invasive mechanical ventilation                                                                                                                                                                                                                                                                                                                                                                                                                           | 1.09 (0.99-1.20)    | 0.08  |                     |       |
| Pronation                                                                                                                                                                                                                                                                                                                                                                                                                                                             | 4.20 (0.91-19.40)   | 0.07  |                     |       |
| <p>Abbreviations: OR, odds ratio; CI, confidence interval; SOFA, sequential organ failure assessment; IL6, interleukin-6; PaO<sub>2</sub>/FiO<sub>2</sub>, arterial partial pressure of oxygen to inspired oxygen fraction ratio; PaCO<sub>2</sub>, arterial partial pressure of carbon dioxide.</p> <p>The variance inflation factors were 1.43 for age, 1.01 for the SOFA score, 1.49 for the Charlson comorbidity index, and 1.15 for endotracheal intubation.</p> |                     |       |                     |       |
