# Supplementary material for: Chest X-ray Does Not Predict the Risk of Endotracheal Intubation and Escalation of Treatment in COVID-19 Patients Requiring Noninvasive Respiratory Support
Source: MDPI journal article supplement (doi:10.3390/jcm11061636), 2022-03-16
Supplement: s1 [file s1]

**Table S5. Comparison between hospital survivors and non-survivors**

| Variable                             | All patients (n = 142) | Survivors (n = 122) | Non-survivors (n = 20) | p-value |
|--------------------------------------|------------------------|---------------------|------------------------|---------|
| Age (years)                          | 69 (58-75)             | 68 (57-74)          | 73 (70-80)             | <0.01   |
| Weight (kg)                          | 78 (69-97)             | 77 (67-102)         | 79 (72-95)             | 0.45    |
| Body mass index (kg/m <sup>2</sup> ) | 26 (22-31)             | 25 (21-31)          | 27 (22-32)             | 0.33    |
| Female gender (n [%])                | 44 (31)                | 39 (32)             | 4 (20)                 | 0.31    |
| Hypertension (n [%])                 | 81 (57)                | 68 (56)             | 13 (65)                | 0.45    |
| Obesity (n [%])                      | 45 (32)                | 39 (32)             | 5 (25)                 | 0.79    |
| Diabetes (n [%])                     | 38 (27)                | 33 (27)             | 5 (25)                 | 1       |
| Days since symptoms onset            | 6 (4-9)                | 6 (4-9)             | 6 (4-10)               | 0.96    |
| SOFA score                           | 3 (2-4)                | 3 (2-4)             | 4 (3-5)                | <0.01   |
| Charlson comorbidity index           | 3 (2-5)                | 3 (2-4)             | 4 (3-5)                | <0.01   |
| C-reactive protein (mg/L)            | 97 (58-160)            | 97 (57-143)         | 150 (65-198)           | 0.19    |
| Procalcitonin (µg/L)                 | 0.18 (0.06-0.48)       | 0.13 (0.06-0.48)    | 0.24 (0.13-0.86)       | 0.16    |
| D-dimer (µg/L)                       | 323 (171-670)          | 295 (166-641)       | 374 (301-1167)         | 0.11    |
| Leukocyte count (x10 <sup>9</sup> )  | 7.58 (4.84-            | 7.53 (4.48-         | 7.78 (6.88-            | 0.36    |

|                                                          |                      |                      |                      |       |
|----------------------------------------------------------|----------------------|----------------------|----------------------|-------|
| cells/L)                                                 | 10.57)               | 10.57)               | 9.97)                |       |
| Lymphocyte count (x10 <sup>9</sup><br>cells/L)           | 0.80 (0.55-<br>1.11) | 0.76 (0.50-<br>1.07) | 0.96 (0.65-<br>1.36) | 0.08  |
| IL-6 (pg/mL)                                             | 55 (31-148)          | 52 (30-121)          | 163 (64-307)         | <0.01 |
| PaO <sub>2</sub> /FiO <sub>2</sub> (mmHg)                | 118 (90-160)         | 123 (91-161)         | 110 (78-119)         | 0.16  |
| PaCO <sub>2</sub> (mmHg)                                 | 35 (31-38)           | 35 (31-38)           | 35 (31-35)           | 0.79  |
| First CARE score                                         | 9 (6-14)             | 10 (5-15)            | 8 (7-12)             | 0.75  |
| Second CARE score                                        | 8 (4-14)             | 8 (4-14)             | 8 (6-13)             | 0.99  |
| Delta CARE score                                         | -1 (-5-3)            | -1 (-5-3)            | -3 (-6-5)            | 0.87  |
| Endotracheal intubation (n<br>[%])                       | 83 (58)              | 64 (52)              | 19 (95)              | <0.01 |
| Duration of invasive<br>mechanical ventilation<br>(days) | 8 (6-13)             | 7 (4-11)             | 17 (11-25)           | 0.18  |
| Pronation (n [%])                                        | 85 (60)              | 71 (58)              | 14 (70)              | 0.05  |

Data are reported as median (interquartile range) or number (percentage), as appropriate. The Wilcoxon's rank-sum test and the Fisher's exact test were applied, as appropriate.

The delta CARE score is the difference between the first and the second CARE score.

Abbreviations: SOFA, sequential organ failure assessment; IL-6, interleukin-6; PaO<sub>2</sub>/FiO<sub>2</sub>, arterial partial pressure of oxygen to inspired oxygen fraction ratio; PaCO<sub>2</sub>, arterial partial pressure of carbon dioxide.
