# Supplementary material for: Chest X-ray Does Not Predict the Risk of Endotracheal Intubation and Escalation of Treatment in COVID-19 Patients Requiring Noninvasive Respiratory Support
Source: MDPI journal article supplement (doi:10.3390/jcm11061636), 2022-03-16
Supplement: s1 [file s1]

**Table S1. Baseline and outcome variables**

|                                                       |                                                                                                                                                                                                                                                                                                                                                                                                                                                                                                                                                                                                                                                                                                                                                                            |
|-------------------------------------------------------|----------------------------------------------------------------------------------------------------------------------------------------------------------------------------------------------------------------------------------------------------------------------------------------------------------------------------------------------------------------------------------------------------------------------------------------------------------------------------------------------------------------------------------------------------------------------------------------------------------------------------------------------------------------------------------------------------------------------------------------------------------------------------|
| Baseline variables<br>collected at NIRS<br>initiation | <ul style="list-style-type: none"><li>● Age (years)</li><li>● Weight (kg)</li><li>● Body mass index (kg/m<sup>2</sup>)</li><li>● Female gender (n [%])</li><li>● Hypertension (n [%])</li><li>● Obesity (n [%])</li><li>● Diabetes (n [%])</li><li>● Days since symptoms onset</li><li>● Sequential organ failure assessment score</li><li>● Charlson comorbidity index</li><li>● C-reactive protein (mg/L)</li><li>● Procalcitonin (µg/L)</li><li>● D-dimer (µg/L)</li><li>● Leukocyte count (x10<sup>9</sup> cells/L)</li><li>● Lymphocyte count (x10<sup>9</sup> cells/L)</li><li>● Interleukin-6 (pg/mL)</li><li>● Arterial partial pressure of oxygen to inspired oxygen fraction ratio (mmHg)</li><li>● Arterial partial pressure of carbon dioxide (mmHg)</li></ul> |
| Outcome variables                                     | <ul style="list-style-type: none"><li>● Escalation of respiratory support (n [%])</li><li>● Pronation (n [%])</li><li>● Endotracheal intubation (n [%])</li><li>● Duration of invasive mechanical ventilation (days)</li><li>● Hospital length of stay (days)</li></ul>                                                                                                                                                                                                                                                                                                                                                                                                                                                                                                    |

|                                                       |                                                                              |
|-------------------------------------------------------|------------------------------------------------------------------------------|
|                                                       | <ul style="list-style-type: none"><li>● Hospital mortality (n [%])</li></ul> |
| Abbreviations: NIRS, noninvasive respiratory support. |                                                                              |
