# Supplementary material for: Chest X-ray Does Not Predict the Risk of Endotracheal Intubation and Escalation of Treatment in COVID-19 Patients Requiring Noninvasive Respiratory Support
Source: MDPI journal article supplement (doi:10.3390/jcm11061636), 2022-03-16
Supplement: s1 [file s1]

**Table S2. Strengthening the reporting of observational studies in epidemiology checklist**

| Item                 |                                                                                                                                   |    | Page |
|----------------------|-----------------------------------------------------------------------------------------------------------------------------------|----|------|
| No                   | Recommendation                                                                                                                    | No |      |
| Title and abstract   | 1 (a) Indicate the study’s design with a commonly used term in the title or the abstract                                          | 3  |      |
|                      | (b) Provide in the abstract an informative and balanced summary of what was done and what was found                               | 3  |      |
| Introduction         |                                                                                                                                   |    |      |
| Background/rationale | 2 Explain the scientific background and rationale for the investigation being reported                                            | 4  |      |
| Objectives           | 3 State specific objectives, including any prespecified hypotheses                                                                | 4  |      |
| Methods              |                                                                                                                                   |    |      |
| Study design         | 4 Present key elements of study design early in the paper                                                                         | 5  |      |
| Setting              | 5 Describe the setting, locations, and relevant dates, including periods of recruitment, exposure, follow-up, and data collection | 5  |      |
| Participants         | 6 (a) Give the eligibility criteria, and the sources and methods of selection of participants. Describe methods of follow-up      | 5  |      |

|                              |    |                                                                                                                                                                                                                                                                                           |                                          |
|------------------------------|----|-------------------------------------------------------------------------------------------------------------------------------------------------------------------------------------------------------------------------------------------------------------------------------------------|------------------------------------------|
|                              |    | (b) For matched studies, give matching criteria and number of exposed and unexposed                                                                                                                                                                                                       |                                          |
| Variables                    | 7  | Clearly define all outcomes, exposures, predictors, potential confounders, and effect modifiers. Give diagnostic criteria, if applicable                                                                                                                                                  | 4, 5<br>S1                               |
| Data sources/<br>measurement | 8  | For each variable of interest, give sources of data and details of methods of assessment (measurement). Describe comparability of assessment methods if there is more than one group                                                                                                      | 4, 5<br>S1                               |
| Bias                         | 9  | Describe any efforts to address potential sources of bias                                                                                                                                                                                                                                 | 6, 7                                     |
| Study size                   | 10 | Explain how the study size was arrived at                                                                                                                                                                                                                                                 | 5, 7<br>8                                |
| Quantitative<br>variables    | 11 | Explain how quantitative variables were handled in the analyses. If applicable, describe which groupings were chosen and why                                                                                                                                                              | 5-7                                      |
| Statistical<br>methods       | 12 | (a) Describe all statistical methods, including those used to control for confounding<br><br>(b) Describe any methods used to examine subgroups and interactions<br><br>(c) Explain how missing data were addressed<br><br>(d) If applicable, explain how loss to follow-up was addressed | 6, 7<br><br>6, 7<br><br>n.a.<br><br>n.a. |

|                  |    |                                                                                                                                                                                                       |        |
|------------------|----|-------------------------------------------------------------------------------------------------------------------------------------------------------------------------------------------------------|--------|
|                  |    | (e) Describe any sensitivity analyses                                                                                                                                                                 | n.a.   |
| <b>Results</b>   |    |                                                                                                                                                                                                       |        |
| Participants     | 13 | (a) Report numbers of individuals at each stage of study—<br>eg numbers potentially eligible, examined for eligibility, confirmed eligible, included in the study, completing follow-up, and analysed | 7, 8   |
|                  |    | (b) Give reasons for non-participation at each stage                                                                                                                                                  | n.a.   |
|                  |    | (c) Consider use of a flow diagram                                                                                                                                                                    | 8      |
| Descriptive data | 14 | (a) Give characteristics of study participants (eg demographic, clinical, social) and information on exposures and potential confounders                                                              | 9      |
|                  |    | (b) Indicate number of participants with missing data for each variable of interest                                                                                                                   | n.a.   |
|                  |    | (c) Summarise follow-up time (eg, average and total amount)                                                                                                                                           | n.a.   |
| Outcome data     | 15 | Report numbers of outcome events or summary measures over time                                                                                                                                        | 10     |
| Main results     | 16 | (a) Give unadjusted estimates and, if applicable, confounder-adjusted estimates and their precision (eg,                                                                                              | 14, 15 |

|                |    |                                                                                                                  |           |
|----------------|----|------------------------------------------------------------------------------------------------------------------|-----------|
|                |    | 95% confidence interval). Make clear which confounders were adjusted for and why they were included              |           |
|                |    | (b) Report category boundaries when continuous variables were categorized                                        | 14,<br>15 |
|                |    | (c) If relevant, consider translating estimates of relative risk into absolute risk for a meaningful time period | n.a.      |
| Other analyses | 17 | Report other analyses done—eg analyses of subgroups and interactions, and sensitivity analyses                   | 6         |

## Discussion

|                  |    |                                                                                                                                                                            |           |
|------------------|----|----------------------------------------------------------------------------------------------------------------------------------------------------------------------------|-----------|
| Key results      | 18 | Summarise key results with reference to study objectives                                                                                                                   | 15        |
| Limitations      | 19 | Discuss limitations of the study, taking into account sources of potential bias or imprecision. Discuss both direction and magnitude of any potential bias                 | 16,<br>17 |
| Interpretation   | 20 | Give a cautious overall interpretation of results considering objectives, limitations, multiplicity of analyses, results from similar studies, and other relevant evidence | 16        |
| Generalisability | 21 | Discuss the generalisability (external validity) of the study results                                                                                                      | 16        |

## Other information

|         |    |                                                                                                                                                               |    |
|---------|----|---------------------------------------------------------------------------------------------------------------------------------------------------------------|----|
| Funding | 22 | Give the source of funding and the role of the funders for the present study and, if applicable, for the original study on which the present article is based | 18 |
|---------|----|---------------------------------------------------------------------------------------------------------------------------------------------------------------|----|

Abbreviations: n.a., not applicable.
