# Supplementary material for: Chest X-ray Does Not Predict the Risk of Endotracheal Intubation and Escalation of Treatment in COVID-19 Patients Requiring Noninvasive Respiratory Support
Source: MDPI journal article supplement (doi:10.3390/jcm11061636), 2022-03-16
Supplement: s1 [file s1]

**Table S3. Logistic regression for the escalation of respiratory support**

| Variable                           | Univariable      |         | Multivariable    |         |
|------------------------------------|------------------|---------|------------------|---------|
|                                    | OR (95% CI)      | p-value | OR (95% CI)      | p-value |
| First CARE score                   | 1.01 (0.96-1.07) | 0.66    |                  |         |
| Age                                | 0.99 (0.96-1.02) | 0.62    |                  |         |
| Female gender                      | 1.10 (0.91-1.37) | 0.15    |                  |         |
| Days since symptoms onset          | 1.07 (0.97-1.17) | 0.16    |                  |         |
| SOFA score                         | 1.30 (0.98-1.71) | 0.06    |                  |         |
| Charlson comorbidity index         | 0.93 (0.81-1.06) | 0.28    |                  |         |
| C-reactive protein                 | 1.01 (1.00-1.01) | 0.05    |                  |         |
| Procalcitonin                      | 1.18 (0.91-1.53) | 0.22    |                  |         |
| D-dimer                            | 1.00 (1.00-1.00) | 0.44    |                  |         |
| Leukocyte count                    | 1.08 (1.01-1.17) | 0.03    | 1.06 (0.98-1.15) | 0.17    |
| Lymphocyte count                   | 0.91 (0.75-1.12) | 0.38    |                  |         |
| IL-6                               | 1.00 (1.00-1.01) | 0.18    |                  |         |
| PaO <sub>2</sub> /FiO <sub>2</sub> | 0.99 (0.99-1.00) | < 0.01  | 0.99 (0.99-1.00) | < 0.01  |
| PaCO <sub>2</sub>                  | 1.05 (0.99-1.11) | 0.14    |                  |         |

Abbreviations: OR, odds ratio; CI, confidence interval; SOFA, sequential organ failure assessment; IL6, interleukin-6; PaO<sub>2</sub>/FiO<sub>2</sub>, arterial partial pressure of oxygen to inspired oxygen fraction ratio; PaCO<sub>2</sub>, arterial partial pressure of carbon dioxide.
