# Supplementary material for: Chest X-ray Does Not Predict the Risk of Endotracheal Intubation and Escalation of Treatment in COVID-19 Patients Requiring Noninvasive Respiratory Support
Source: MDPI journal article supplement (doi:10.3390/jcm11061636), 2022-03-16
Supplement: s1 [file s1]

**Table S4. Linear regression for endotracheal intubation duration**

| Variable                                                                                                                                                                                                    | Univariable        |         |
|-------------------------------------------------------------------------------------------------------------------------------------------------------------------------------------------------------------|--------------------|---------|
|                                                                                                                                                                                                             | Estimate (95% CI)  | p-value |
| First CARE score                                                                                                                                                                                            | 0.13 (-0.13-0.38)  | 0.32    |
| Age                                                                                                                                                                                                         | -0.11 (-0.28-0.07) | 0.23    |
| Female gender                                                                                                                                                                                               | -3.41 (-7.59-0.78) | 0.11    |
| Days since symptoms onset                                                                                                                                                                                   | 0.42 (-0.14-0.98)  | 0.14    |
| SOFA score                                                                                                                                                                                                  | 1.66 (0.16-3.16)   | 0.03    |
| Charlson comorbidity index                                                                                                                                                                                  | -0.53 (-1.28-0.22) | 0.16    |
| C-reactive protein                                                                                                                                                                                          | 0.01 (-0.02-0.04)  | 0.43    |
| Procalcitonin                                                                                                                                                                                               | 0.60 (-0.61-1.80)  | 0.33    |
| D-dimer                                                                                                                                                                                                     | -0.00 (-0.00-0.00) | 0.30    |
| Leukocyte count                                                                                                                                                                                             | 0.05 (-0.36-0.47)  | 0.80    |
| Lymphocyte count                                                                                                                                                                                            | -1.45 (-3.18-0.28) | 0.10    |
| IL-6                                                                                                                                                                                                        | 0.00 (-0.01-0.01)  | 0.96    |
| PaO <sub>2</sub> /FiO <sub>2</sub>                                                                                                                                                                          | -0.01 (-0.04-0.02) | 0.46    |
| PaCO <sub>2</sub>                                                                                                                                                                                           | -0.07 (-0.37-0.24) | 0.67    |
| Abbreviations: OR, odds ratio; CI, confidence interval; SOFA, sequential organ failure assessment; IL6, interleukin-6; PaO <sub>2</sub> /FiO <sub>2</sub> , arterial partial pressure of oxygen to inspired |                    |         |

oxygen fraction ratio; PaCO<sub>2</sub>, arterial partial pressure of carbon dioxide.
